# Supplementary material
Source: publisher figshare collection journal article supplement (https://asha.figshare.com/articles/dataset/_/6170234)
Supplement: Supplementary file 1 [file 1]

## **Supplemental Appendix**

### **Search Strategy**

#### **Databases**

The following databases were searched April 2013 through August 2013: Aphasiology Archive, British Library Catalogue, Centre for Reviews and Dissemination Database, Cochrane Library (Wiley), ComDisDome (ProQuest), Communication & Mass Media Complete (EBSCO), Education Research Complete (EBSCO), ERIC (ProQuest), Google Scholar, Health Source: Nursing/Academic Edition (EBSCO), HighWire Press, Latin American and Caribbean Health Sciences (LILACS) via Virtual Health Library, Linguistics and Language Behavior Abstracts (ProQuest), PsycBITE, Psychology and Behavioral Sciences Collection (EBSCO), PsycINFO (EBSCO), PubMed, REHABDATA, Science Citation Index Expanded (ISI Thomson Reuters), ScienceDirect, Social Sciences Citation Index (ISI Thomson Reuters), Social Services Abstracts (ProQuest), speechBITE, and Teacher Reference Center (EBSCO).

#### **Search Terms**

Controlled vocabulary, such as Medical Subject Headings (MeSH), were used when available.

Search terms used in isolation or in combination in one or more databases included the following: *telemedicine, telepractice, telerehabilitation, acquired brain injury, traumatic brain injury, stroke, cerebrovascular accident (CVA), aphasia, dysarthria, apraxia, communication disorder or impairment, cognitive disorder or impairment, speech-language pathology assessment, speech-language pathology treatment, and speech language pathology intervention*

All search terms were truncated or expanded as necessary.

#### **Limits**

Limits varied by database and included the following, as available: Originally written in English or translated into English; peer reviewed publications; adults 18 years or older with acquired brain injury; publication year 1980 to present.

#### **Forward Search**

All accepted articles were forward searched in ISI Web of Science (Thomson Reuters).

#### **Reference Checking**

The reference lists of all relevant articles identified were scanned for other possible studies.

#### **Prolific Author Search**

All publications by the following prolific authors were searched: Thomas Bergquist, David Brennan, Pamela Forducey, Amy Georgeadis, Anne Hill, Kristine Lundgren, Pauline Mashima, Jane Mortley, Deborah Theodoros, Lyn Tindall, Julia Wade, Robert Wertz
