# Supplementary material
Source: publisher figshare collection journal article supplement (https://asha.figshare.com/articles/dataset/_/6170234)
Supplement: Supplementary file 2 [file 1]

**Supplemental Table S1.** Critical appraisal indicator definitions for group studies.

| Critical appraisal indicator        | Description                                                                                                                      |
|-------------------------------------|----------------------------------------------------------------------------------------------------------------------------------|
| Adequacy of protocol description    | Ample details about the study procedures were provided, allowing replication of the study protocol.                              |
| Blinding of assessors               | Information about the groups to which participants were assigned is withheld from the assessors.                                 |
| Description of the sampling process | A description of how participants were randomly selected from the population of interest is provided.                            |
| Randomization to condition/sequence | A description of the randomization to experimental condition or sequence was reported.                                           |
| Equivalence of groups at pre-test   | No significant difference between groups on key pre-test measures was noted.                                                     |
| Treatment fidelity                  | Authors documented procedures used to ensure that the protocol was delivered as intended.                                        |
| Reporting of <i>p</i> values        | <i>p</i> values relevant to the clinical questions for this evidence-based systematic review (EBSR) were reported or calculable. |
| Reporting of effect sizes           | Effect sizes relevant to the clinical questions for this EBSR were reported or calculable.                                       |
| Analysis of intention to treat      | For randomized controlled trials, intention-to-treat analysis was described, when appropriate.                                   |
